# Supplementary material for: Distinctive courtship phenotype of the Vogelkop Superb Bird-of-Paradise Lophorina niedda Mayr, 1930 confirms new species status
Source: PeerJ. 2018 Apr 16;6:e4621. doi: 10.7717/peerj.4621 (PMC5907773; doi:10.7717/peerj.4621)
Supplement: Table S1 — Descriptive metadata and source information for the audiovisual data used in the analysis. [file peerj-06-4621-s002.xlsx]

## Sheet: Scholes Lophorina Sheeet for Up
Source	ID	Format	Scientific Name	Same Individual As	Day	Month	Year	Time	Country	State	Locality	Latitude	Longitude	Elevation (m)	Adult Male(s)	Adult Female(s)	Behaviors	Recordist
Macaulay Library	ML487530	Video	Lophorina niedda		21	Jun	2017	1611	Indonesia	Papua	Papua Barat; Minggre	-1.093	133.904	1700	1	1	Advertisement Display, Horizontal Display, Pointing Display, Cape Presentation Display.	Timothy G Laman
Macaulay Library	ML487531	Video	Lophorina niedda	ML487530	22	Jun	2017	856	Indonesia	Papua	Papua Barat; Minggre	-1.093	133.904	1700	1		Advertisement Display.	Timothy G Laman
Macaulay Library	ML487532	Video	Lophorina niedda	ML487530	22	Jun	2017	1245	Indonesia	Papua	Papua Barat; Minggre	-1.093	133.904	1700	1	1	Horizontal Display, Pointing Display, Cape Presentation Display.	Timothy G Laman
Macaulay Library	ML487533	Video	Lophorina niedda	ML487530	22	Jun	2017	1402	Indonesia	Papua	Papua Barat; Minggre	-1.093	133.904	1700	1		Advertisement Display.	Timothy G Laman
Macaulay Library	ML487534	Video	Lophorina niedda	ML487530	22	Jun	2017	1405	Indonesia	Papua	Papua Barat; Minggre	-1.093	133.904	1700	1		Advertisement Display, Pointing Display.	Timothy G Laman
Macaulay Library	ML487535	Video	Lophorina niedda	ML487530	22	Jun	2017	1406	Indonesia	Papua	Papua Barat; Minggre	-1.093	133.904	1700	1		Horizontal Display, Pointing Display.	Timothy G Laman
Macaulay Library	ML487536	Video	Lophorina niedda	ML487530	22	Jun	2017	1409	Indonesia	Papua	Papua Barat; Minggre	-1.093	133.904	1700	1		Horizontal Display, Pointing Display.	Timothy G Laman
Macaulay Library	ML487537	Video	Lophorina niedda	ML487530	22	Jun	2017	1411	Indonesia	Papua	Papua Barat; Minggre	-1.093	133.904	1700	1		Pointing Display.	Timothy G Laman
Macaulay Library	ML487538	Video	Lophorina niedda	ML487530	22	Jun	2017	1412	Indonesia	Papua	Papua Barat; Minggre	-1.093	133.904	1700	1	1	Pointing Display, Cape Presentation Display.	Timothy G Laman
Macaulay Library	ML487539	Video	Lophorina niedda	ML487530	23	Jun	2017	832	Indonesia	Papua	Papua Barat; Minggre	-1.093	133.904	1700	1		Horizontal Display, Pointing Display.	Timothy G Laman
Macaulay Library	ML487540	Video	Lophorina niedda	ML487530	23	Jun	2017	950	Indonesia	Papua	Papua Barat; Minggre	-1.093	133.904	1700	1	1	Advertisement Display, Horizontal Display, Pointing Display, Cape Presentation Display.	Timothy G Laman
Macaulay Library	ML487541	Video	Lophorina niedda	ML487530	23	Jun	2017	959	Indonesia	Papua	Papua Barat; Minggre	-1.093	133.904	1700	1		Pointing Display, Cape Presentation Display.	Timothy G Laman
Macaulay Library	ML487542	Video	Lophorina niedda	ML487530	24	Jun	2017	805	Indonesia	Papua	Papua Barat; Minggre	-1.093	133.904	1700	1		Cape Presentation Display.	Timothy G Laman
Macaulay Library	ML487543	Video	Lophorina niedda	ML487530	24	Jun	2017	818	Indonesia	Papua	Papua Barat; Minggre	-1.093	133.904	1700	1		Advertisement Display, Cape Presentation Display.	Timothy G Laman
Macaulay Library	ML487544	Video	Lophorina niedda	ML487530	24	Jun	2017	1039	Indonesia	Papua	Papua Barat; Minggre	-1.093	133.904	1700	1		Pointing Display, Cape Presentation Display.	Timothy G Laman
Macaulay Library	ML487545	Video	Lophorina niedda	ML487530	24	Jun	2017	1041	Indonesia	Papua	Papua Barat; Minggre	-1.093	133.904	1700	1		Cape Presentation Display.	Timothy G Laman
Macaulay Library	ML487546	Video	Lophorina niedda	ML487530	24	Jun	2017	1043	Indonesia	Papua	Papua Barat; Minggre	-1.093	133.904	1700	1		Cape Presentation Display.	Timothy G Laman
Macaulay Library	ML487547	Video	Lophorina niedda	ML487530	24	Jun	2017	1045	Indonesia	Papua	Papua Barat; Minggre	-1.093	133.904	1700	1		Pointing Display, Cape Presentation Display.	Timothy G Laman
Macaulay Library	ML487548	Video	Lophorina niedda	ML487530	24	Jun	2017	1046	Indonesia	Papua	Papua Barat; Minggre	-1.093	133.904	1700	1		Cape Presentation Display.	Timothy G Laman
Macaulay Library	ML487549	Video	Lophorina niedda	ML487530	24	Jun	2017	1047	Indonesia	Papua	Papua Barat; Minggre	-1.093	133.904	1700	1		Cape Presentation Display.	Timothy G Laman
Macaulay Library	ML487550	Video	Lophorina niedda	ML487530	24	Jun	2017	1049	Indonesia	Papua	Papua Barat; Minggre	-1.093	133.904	1700	1		Cape Presentation Display.	Timothy G Laman
Macaulay Library	ML487551	Video	Lophorina niedda	ML487530	24	Jun	2017	1050	Indonesia	Papua	Papua Barat; Minggre	-1.093	133.904	1700	1		Leaf Tossing, Cape Presentation.	Timothy G Laman
Macaulay Library	ML487552	Video	Lophorina niedda	ML487530	24	Jun	2017	1053	Indonesia	Papua	Papua Barat; Minggre	-1.093	133.904	1700	1		Cape Presentation Display.	Timothy G Laman
Macaulay Library	ML487553	Video	Lophorina niedda	ML487530	24	Jun	2017	1053	Indonesia	Papua	Papua Barat; Minggre	-1.093	133.904	1700	1		Cape Presentation Display.	Timothy G Laman
Macaulay Library	ML487554	Video	Lophorina niedda		29	Oct	2017	1132	Indonesia	Papua	Papua Barat; Minggre	-1.093	133.904	1700	1		Leaf Tossing, Cape Presentation.	Timothy G Laman
Macaulay Library	ML487555	Video	Lophorina niedda	ML487554	29	Oct	2017	1137	Indonesia	Papua	Papua Barat; Minggre	-1.093	133.904	1700	1		Horizontal Display, Pointing Display, Cape Presentation Display.	Timothy G Laman
Macaulay Library	ML487556	Video	Lophorina niedda	ML487554	29	Oct	2017	1510	Indonesia	Papua	Papua Barat; Minggre	-1.093	133.904	1700	1	1	Advertisement Display, Horizontal Display, Cape Presentation Display.	Edwin Scholes
Macaulay Library	ML487557	Video	Lophorina niedda	ML487554	29	Oct	2017	1512	Indonesia	Papua	Papua Barat; Minggre	-1.093	133.904	1700	1	1	Horizontal Display, Cape Presentation Display.	Timothy G Laman
Macaulay Library	ML487558	Video	Lophorina niedda	ML487554	29	Oct	2017	1513	Indonesia	Papua	Papua Barat; Minggre	-1.093	133.904	1700	1		Horizontal Display.	Timothy G Laman
Macaulay Library	ML487559	Video	Lophorina niedda	ML487554	29	Oct	2017	1531	Indonesia	Papua	Papua Barat; Minggre	-1.093	133.904	1700	1		Horizontal Display (with Hop Run), Advertisement Display.	Timothy G Laman
Macaulay Library	ML487560	Video	Lophorina niedda	ML487554	30	Oct	2017	706	Indonesia	Papua	Papua Barat; Minggre	-1.093	133.904	1700	1		Cape Presentation Display.	Timothy G Laman
Macaulay Library	ML487561	Video	Lophorina niedda	ML487554	30	Oct	2017	708	Indonesia	Papua	Papua Barat; Minggre	-1.093	133.904	1700	1		Cape Presentation Display.	Timothy G Laman
Macaulay Library	ML487562	Video	Lophorina niedda	ML487554	1	Nov	2017	557	Indonesia	Papua	Papua Barat; Minggre	-1.093	133.904	1700	1	1	Horizontal Display, Pointing Display, Cape Presentation Display (with copulation).	Edwin Scholes
Macaulay Library	ML487563	Video	Lophorina niedda	ML487530	1	Nov	2017	947	Indonesia	Papua	Papua Barat; Minggre	-1.093	133.904	1700	1		Horizontal Display (with Hop Run).	Timothy G Laman
Macaulay Library	ML487564	Video	Lophorina niedda	ML487554	2	Nov	2017	805	Indonesia	Papua	Papua Barat; Minggre	-1.093	133.904	1700	1		Cape Presentation Display.	Timothy G Laman
Macaulay Library	ML487565	Video	Lophorina niedda	ML487530	2	Nov	2017	1011	Indonesia	Papua	Papua Barat; Minggre	-1.093	133.904	1700	1		Advertisement Display, Leaf Tossing.	Timothy G Laman
Macaulay Library	ML487566	Video	Lophorina niedda	ML487554	3	Nov	2017	605	Indonesia	Papua	Papua Barat; Minggre	-1.093	133.904	1700	1		Cape Presentation Display.	Timothy G Laman
Macaulay Library	ML487567	Video	Lophorina niedda	ML487554	3	Nov	2017	640	Indonesia	Papua	Papua Barat; Minggre	-1.093	133.904	1700	1	1	Advertisement Display, Horizontal Display, Pointing Display, Cape Presentation Display (with copulation).	Edwin Scholes
Macaulay Library	ML487568	Video	Lophorina niedda	ML487530	3	Nov	2017	643	Indonesia	Papua	Papua Barat; Minggre	-1.093	133.904	1700	1	1	Cape Presentation Display (with copulation).	Timothy G Laman
Macaulay Library	ML487529	Video	Lophorina superba		28	Oct	2003	1332	Papua New Guinea	Sandaun (West Sepik)	Mt. Stolle; Mekil Biological Research Station	-4.8134	141.653	1700	1		Cape Presentation Display.	Kimberly Bostwick
Macaulay Library	ML487528	Video	Lophorina superba	ML487528	11	Oct	2003	1345	Papua New Guinea	Sandaun (West Sepik)	Mt. Stolle; Mekil Biological Research Station	-4.8134	141.653	1700	1		Cape Presentation Display.	Kimberly Bostwick
Macaulay Library	ML458167	Video	Lophorina superba		10	Oct	2000		Papua New Guinea	Sandaun (West Sepik)	Mt. Stolle; Mekil Biological Research Station	-4.8134	141.653	1700	1		Advertisement Display, Horizontal Display, Pointing Display	Edwin Scholes
Macaulay Library	ML458003	Video	Lophorina superba		27	Nov	2001		Papua New Guinea	Madang	Adelbert Mountains.	-4.7221	145.274	1440	1	1	Advertisement Display, Horizontal Display, Pointing Display, Cape Presentation Display.	Edwin Scholes
Macaulay Library	ML458002	Video	Lophorina superba	ML458003	27	Nov	2001		Papua New Guinea	Madang	Adelbert Mountains.	-4.7221	145.274	1440	1		Advertisement Display, Horizontal Display, Pointing Display	Edwin Scholes
Macaulay Library	ML458001	Video	Lophorina superba	ML458003	26	Nov	2001		Papua New Guinea	Madang	Adelbert Mountains.	-4.7221	145.274	1440	1		Advertisement Display, Horizontal Display.	Edwin Scholes
Macaulay Library	ML458000	Video	Lophorina superba	ML458003	26	Nov	2001		Papua New Guinea	Madang	Adelbert Mountains.	-4.7221	145.274	1440	1		Advertisement Display, Horizontal Display, Pointing Display, Cape Presentation Display.	Edwin Scholes
Macaulay Library	ML85763651	Audio	Lophorina niedda		3	Jul	2016	1253	Indonesia	Papua	Papua Barat; Minggre	-1.093	133.904	1700	1			Edwin Scholes
Macaulay Library	ML85763571	Audio	Lophorina niedda	ML85763651	3	Jul	2016	1253	Indonesia	Papua	Papua Barat; Minggre	-1.093	133.904	1700	1			Edwin Scholes
